# Supplementary material for: Microfluidic digital focus assays for the quantification of infectious influenza virus
Source: Royal Society of Chemistry journal article supplement (doi:10.1039/d4lc00940a), 2025-01-01
Supplement: d4lc00940a1.pdf [file d4lc00940a1.pdf]

## Supplemental Information

### Microfluidic digital focus assays for the quantification of infectious influenza virus

Siddharth Raghu Srimathi,<sup>1,2</sup> Maxinne A. Ignacio,<sup>3</sup> Maria Rife,<sup>4</sup> Sheldon Tai,<sup>5</sup>  
Donald K. Milton,<sup>5</sup> Margaret A. Scull,<sup>3\*</sup> Don L. DeVoe<sup>2,5\*</sup>

<sup>1</sup>Department of Chemical and Biomolecular Engineering, University of Maryland, College Park

<sup>2</sup>Fischell Institute for Biomedical Devices, University of Maryland, College Park

<sup>3</sup>Department of Cell Biology and Molecular Genetics, Maryland Pathogen Research Institute (MPRI), University of Maryland, College Park

<sup>4</sup>Department of Global, Environmental, and Occupational Health, University of Maryland, College Park

<sup>5</sup>Department of Mechanical Engineering, University of Maryland, College Park

\*Corresponding authors

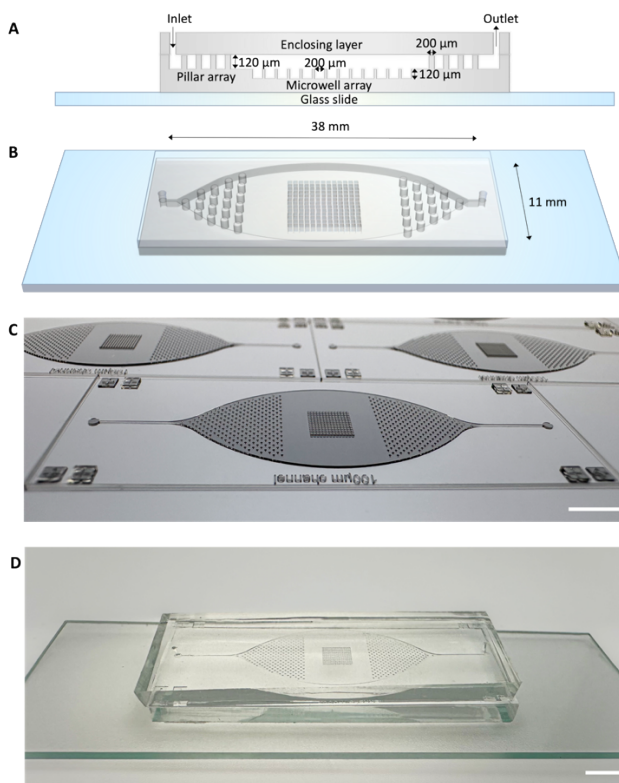

**Figure S1: Overview of the dFA chip geometry.** (A) Cross-sectional schematic of a PDMS chip bonded to the glass slide, with feature dimensions indicated. (B) Perspective view of a chip revealing the 13x13 microwell array and enclosing channel with inlet and outlet pillar arrays designed for improved cell seeding uniformity. (C) Image of a fabricated multi-layer SU-8 wafer with 8 devices per mold. (D) An image of the enclosed PDMS microwell array chip. Scale bar: 4 mm.

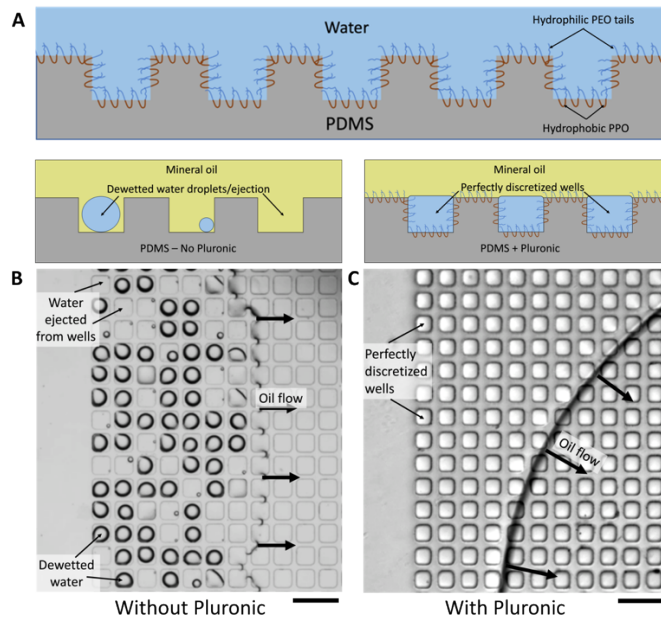

**Figure S2: Hydrophilic surface modification through embedded Pluronic surfactant.**

(A) Pluronic F-108 embedded into the PDMS matrix yields a hydrophilic surface after overnight exposure to water. (B) Cross-sectional schematic and image of the 200  $\mu\text{m}$  PDMS microwells without embedded Pluronic F-108. Flowing mineral oil over the microwells prefilled with water caused dewetting and partial ejection of water from the microwells. (C) Cross-sectional schematic and image of the 200  $\mu\text{m}$  PDMS microwells with embedded Pluronic F-108. Flowing mineral oil over the microwells yields perfect discretization of the microwells without observable loss of water. Scale bar: 500  $\mu\text{m}$ .

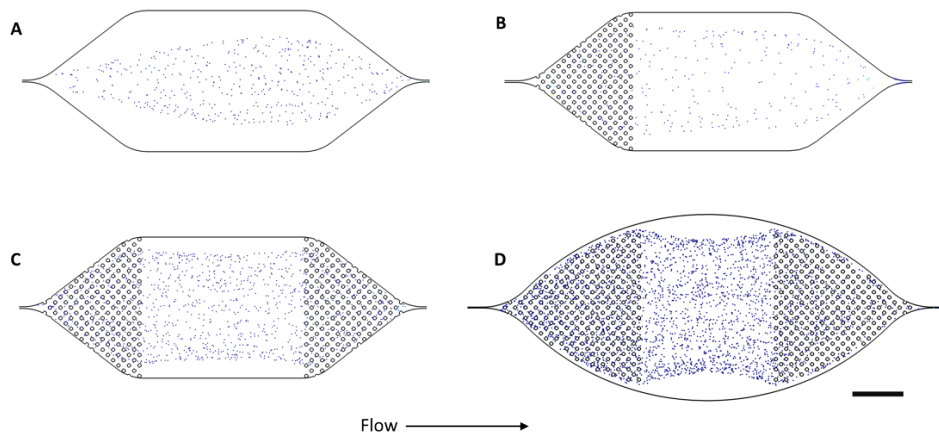

**Figure S3: Cell suspension flow simulation results.** COMSOL Multiphysics simulation depicting the flow behavior of cell suspension liquids through (A) a rectangular enclosing channel without pillar arrays, (B) a rectangular enclosing channel with pillar arrays on the inlet, (C) a rectangular enclosing channel with pillar arrays on both the inlet and the outlet, and (D) a continuously curving channel with pillar arrays on both the inlet and the outlet, designed to promote mixing and uniform lateral distribution of the cells to the microwell arrays. Scale bar: 3 mm.

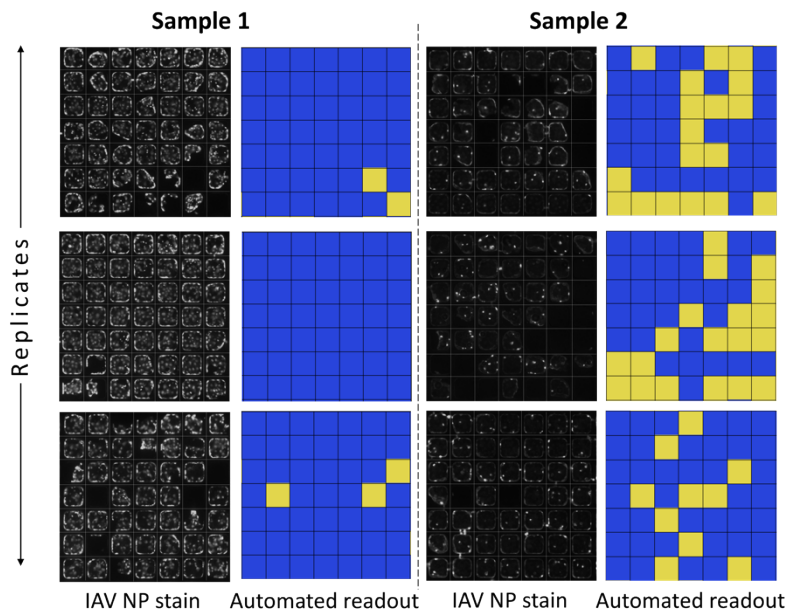

**Figure S4: Fluorescence images and automated dFA readout for nasal swab specimens.** Images and binary readout for a subset of wells in each of 3 replicate chips run on nasal swab specimens with high (sample 1) and low (sample 2) viral titer.
